# Supplementary material for: The anti-adiposity effect of bitter melon seed oil is solely attributed to its fatty acid components
Source: PubMed Central journal article supplement (PMC5622538; doi:10.1186/s12944-017-0578-3), 2017-09-29
Supplement: 12944_2017_578_MOESM1_ESM.pdf [file 12944_2017_578_MOESM1_ESM.pdf]

Additional files 1. Gene names and sequences of PCR primers.

---

| Gene         | Encoding protein                               | Accession number | Primer                                                        |
|--------------|------------------------------------------------|------------------|---------------------------------------------------------------|
| <i>Nampt</i> | nicotinamide<br>phosphoribosyl-<br>transferase | NM_021524        | F: AGCAG CAGAG CACAG TACCA<br>R: GCTAT CGCTG ACCAC AGACA      |
| <i>Sirt1</i> | sirtuin 1                                      | NM_019812        | F: CCGCG GATAG GTCCA TATAC TT<br>R: CGCTT TGGTG GTTCT GAAAG G |

---
